# Supplementary material
Source: Springer Nature journal article supplement (https://www.springermedizin.de/resource/supplementary/12916_2011_534_MOESM7_ESM.pdf/9598078)

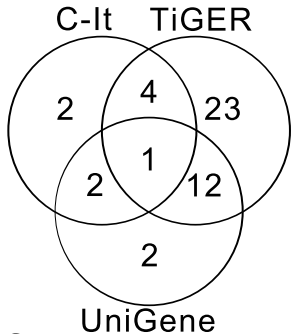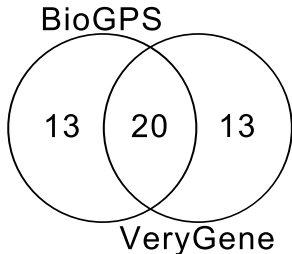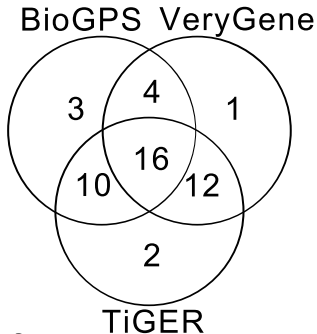

Supplement: MOESM7 [file 9598078]
